# Supplementary material
Source: PubMed Central journal article supplement (PMC9827465)
Supplement: Supplementary_Data2.pdf [file Supplementary_Data2.pdf]

Table SI. Clinicopathological variables and METTL3 protein expression in gastric cancer patients.

| Variable                | n  | METTL3 expression           |               | P-value           |
|-------------------------|----|-----------------------------|---------------|-------------------|
|                         |    | High <sup>b</sup><br>(n=37) | Low<br>(n=37) |                   |
| Sex                     |    |                             |               | 1 <sup>c</sup>    |
| Male                    | 56 | 28                          | 28            |                   |
| Female                  | 18 | 9                           | 9             |                   |
| Age, years              |    |                             |               | 0.82 <sup>c</sup> |
| <69 <sup>a</sup>        | 33 | 16                          | 17            |                   |
| ≥69                     | 41 | 21                          | 20            |                   |
| Histological type       |    |                             |               | 0.48 <sup>c</sup> |
| Intestinal type         | 43 | 23                          | 20            |                   |
| Diffuse type            | 31 | 14                          | 17            |                   |
| Pathological T category |    |                             |               | 1 <sup>c</sup>    |
| pT1/2                   | 28 | 14                          | 14            |                   |
| pT3/4                   | 46 | 23                          | 23            |                   |
| Vessel invasion         |    |                             |               | 1 <sup>c</sup>    |
| Present                 | 54 | 27                          | 27            |                   |
| Absent                  | 20 | 10                          | 10            |                   |
| Lymphovascular invasion |    |                             |               | 0.77 <sup>c</sup> |
| Present                 | 59 | 30                          | 29            |                   |
| Absent                  | 15 | 7                           | 8             |                   |
| Lymph node metastasis   |    |                             |               | 1 <sup>c</sup>    |
| Present                 | 42 | 21                          | 21            |                   |

|                         |    |    |    |                   |
|-------------------------|----|----|----|-------------------|
| Absent                  | 32 | 16 | 16 |                   |
| Distant metastasis      |    |    |    | 1 <sup>c</sup>    |
| Present                 | 22 | 11 | 11 |                   |
| Absent                  | 52 | 26 | 26 |                   |
| UICC TNM classification |    |    |    | 0.99 <sup>d</sup> |
| Stage I                 | 27 | 14 | 13 |                   |
| Stage II                | 13 | 6  | 7  |                   |
| Stage III               | 12 | 6  | 6  |                   |
| Stage IV                | 22 | 11 | 11 |                   |

<sup>a</sup>Median age at surgery was 69 years in this cohort; <sup>b</sup>Cutoff threshold of METTL3 expression was determined by ROC analysis with Youden's index for overall survival of GC patients; <sup>c</sup> $\chi^2$  test; <sup>d</sup>Cochran-Armitage test for trend. METTL3, methyltransferase-like 3; GC, gastric cancer.
